# Supplementary material for: Protective Effects of Lactobacillus plantarum CCFM8610 against Acute Toxicity Caused by Different Food-Derived Forms of Cadmium in Mice
Source: MDPI journal article supplement (doi:10.3390/ijms222011045), 2021-10-13
Supplement: s1 [file s1]

**Table S1.** Relative differences in identified metabolite levels in mice.

|     | Relative ion intensity (10 <sup>5</sup> ) |        |                   |        |        |        |        |        |        |        | P values |                   |        |        |          |        |          |       |        |                       | Class |
|-----|-------------------------------------------|--------|-------------------|--------|--------|--------|--------|--------|--------|--------|----------|-------------------|--------|--------|----------|--------|----------|-------|--------|-----------------------|-------|
|     | Control                                   |        | CdCl <sub>2</sub> |        | Cd-Cit |        | Cd-GSH |        | Cd-MT  |        | Control  | CdCl <sub>2</sub> |        | Cd-Cit |          | Cd-GSH |          | Cd-MT |        |                       |       |
|     | C                                         | 8610   | Cd                | Cd8    | Cit    | Cit8   | GSH    | GSH8   | MT     | MT8    | C-8610   | Cd-C              | Cd8-Cd | Cit-C  | Cit8-Cit | GSH-C  | GSH8-GSH | MT-C  | MT8-MT |                       |       |
| A1  | 128                                       | 83     | 128               | 114    | 100    | 142    | 136    | 121    | 126    | 127    | 0.129    | 0.936             | 0.109  | 0.027  | 0.031    | 0.751  | 0.692    | 0.927 | 0.971  | Amines                |       |
| A2  | 181                                       | 136    | 187               | 146    | 166    | 144    | 166    | 177    | 198    | 167    | 0.170    | 0.784             | 0.183  | 0.379  | 0.290    | 0.699  | 0.769    | 0.091 | 0.025  |                       |       |
| A3  | 45                                        | 37     | 33                | 54     | 46     | 46     | 28     | 59     | 31     | 27     | 0.689    | 0.344             | 0.256  | 0.932  | 0.972    | 0.232  | 0.029    | 0.284 | 0.346  |                       |       |
| A4  | 108                                       | 62     | 97                | 78     | 67     | 60     | 64     | 91     | 70     | 100    | 0.086    | 0.666             | 0.439  | 0.008  | 0.644    | 0.212  | 0.396    | 0.024 | 0.054  |                       |       |
| A5  | 137                                       | 122    | 182               | 191    | 217    | 189    | 140    | 152    | 151    | 163    | 0.665    | 0.042             | 0.883  | 0.039  | 0.546    | 0.921  | 0.745    | 0.510 | 0.637  |                       |       |
| A6  | 418                                       | 267    | 259               | 234    | 301    | 240    | 245    | 229    | 195    | 172    | 0.059    | 0.050             | 0.421  | 0.103  | 0.130    | 0.041  | 0.708    | 0.017 | 0.646  | amino acid            |       |
| A7  | 896                                       | 792    | 1,027             | 1,042  | 1,521  | 1,781  | 1,066  | 1,713  | 1,251  | 1,753  | 0.571    | 0.455             | 0.880  | 0.027  | 0.317    | 0.704  | 0.217    | 0.155 | 0.144  |                       |       |
| A8  | 363                                       | 404    | 389               | 510    | 593    | 618    | 570    | 572    | 439    | 530    | 0.394    | 0.544             | 0.078  | 0.001  | 0.719    | 0.106  | 0.985    | 0.354 | 0.349  |                       |       |
| A9  | 1,477                                     | 1,481  | 1,100             | 2,286  | 2,107  | 2,121  | 2,094  | 1,595  | 1,202  | 1,124  | 0.990    | 0.080             | 0.086  | 0.016  | 0.939    | 0.161  | 0.287    | 0.193 | 0.698  |                       |       |
| A10 | 386                                       | 410    | 338               | 601    | 633    | 615    | 586    | 496    | 372    | 404    | 0.756    | 0.354             | 0.052  | 0.008  | 0.796    | 0.022  | 0.275    | 0.843 | 0.698  | amino acid derivative |       |
| A11 | 163                                       | 195    | 168               | 231    | 171    | 273    | 260    | 280    | 265    | 299    | 0.258    | 0.702             | 0.257  | 0.642  | 0.025    | 0.194  | 0.816    | 0.067 | 0.547  |                       |       |
| A12 | 21,621                                    | 24,485 | 18,075            | 21,671 | 19,906 | 16,794 | 13,984 | 13,720 | 16,737 | 16,399 | 0.137    | 0.158             | 0.375  | 0.641  | 0.545    | 0.151  | 0.949    | 0.047 | 0.833  | fatty acid            |       |
| A13 | 96                                        | 78     | 82                | 80     | 68     | 54     | 52     | 64     | 66     | 60     | 0.287    | 0.236             | 0.775  | 0.044  | 0.090    | 0.010  | 0.158    | 0.161 | 0.710  |                       |       |
| A14 | 4,937                                     | 4,200  | 3,318             | 3,265  | 3,446  | 2,770  | 2,925  | 2,553  | 3,150  | 2,607  | 0.316    | 0.001             | 0.816  | 0.061  | 0.377    | 0.124  | 0.695    | 0.059 | 0.471  |                       |       |
| A15 | 1,677                                     | 1,439  | 978               | 795    | 1,198  | 872    | 1,080  | 728    | 950    | 679    | 0.415    | 0.025             | 0.159  | 0.175  | 0.365    | 0.315  | 0.520    | 0.077 | 0.416  |                       |       |
| A16 | 19,094                                    | 17,233 | 9983              | 12,094 | 11,614 | 9,882  | 9,533  | 10,177 | 12,278 | 8,594  | 0.437    | 0.003             | 0.141  | 0.004  | 0.398    | 0.025  | 0.795    | 0.106 | 0.313  |                       |       |
| A17 | 2,024                                     | 1,575  | 1,350             | 1,025  | 1,126  | 935    | 857    | 942    | 1,607  | 777    | 0.069    | 0.005             | 0.018  | 0.002  | 0.142    | 0.019  | 0.758    | 0.364 | 0.118  |                       |       |
| A18 | 29,404                                    | 25,705 | 20,120            | 25,506 | 27,281 | 25,050 | 21,652 | 18,123 | 21,604 | 17,035 | 0.354    | 0.003             | 0.069  | 0.312  | 0.698    | 0.177  | 0.466    | 0.042 | 0.161  |                       |       |
| A19 | 6,624                                     | 7,093  | 4,935             | 5,741  | 5,158  | 4,001  | 3,731  | 4,213  | 5,284  | 4,064  | 0.478    | 0.047             | 0.329  | 0.072  | 0.115    | 0.006  | 0.354    | 0.218 | 0.238  |                       |       |
| A20 | 75,714                                    | 72,186 | 58,943            | 70,000 | 64,905 | 56,763 | 51,155 | 54,146 | 58,631 | 51,387 | 0.528    | 0.020             | 0.120  | 0.173  | 0.454    | 0.069  | 0.748    | 0.047 | 0.306  |                       |       |
| A21 | 1,435                                     | 1,154  | 1,191             | 949    | 1,046  | 739    | 733    | 944    | 964    | 878    | 0.314    | 0.235             | 0.348  | 0.060  | 0.030    | 0.009  | 0.116    | 0.145 | 0.742  |                       |       |

|     |       |       |       |       |       |       |       |       |       |       |       |       |       |       |       |       |       |       |       |                  |
|-----|-------|-------|-------|-------|-------|-------|-------|-------|-------|-------|-------|-------|-------|-------|-------|-------|-------|-------|-------|------------------|
| A22 | 517   | 477   | 487   | 477   | 423   | 422   | 445   | 461   | 450   | 424   | 0.248 | 0.371 | 0.754 | 0.020 | 0.958 | 0.268 | 0.793 | 0.111 | 0.497 |                  |
| A23 | 132   | 170   | 88    | 141   | 158   | 153   | 130   | 128   | 119   | 113   | 0.331 | 0.053 | 0.040 | 0.214 | 0.803 | 0.872 | 0.898 | 0.264 | 0.560 | Carboxylic Acids |
| A24 | 70    | 32    | 26    | 31    | 25    | 15    | 10    | 13    | 78    | 17    | 0.176 | 0.133 | 0.671 | 0.129 | 0.035 | 0.068 | 0.589 | 0.916 | 0.414 |                  |
| A25 | 36    | 41    | 63    | 64    | 76    | 75    | 55    | 76    | 58    | 70    | 0.252 | 0.000 | 0.837 | 0.024 | 0.926 | 0.157 | 0.109 | 0.230 | 0.484 | phospho sugar    |
| A26 | 24    | 25    | 39    | 16    | 17    | 12    | 13    | 19    | 28    | 21    | 0.929 | 0.301 | 0.166 | 0.274 | 0.026 | 0.128 | 0.320 | 0.754 | 0.557 |                  |
| A27 | 2,105 | 1,537 | 2,350 | 1,580 | 1,358 | 1,459 | 1,533 | 1,760 | 2,078 | 1,774 | 0.152 | 0.414 | 0.022 | 0.050 | 0.808 | 0.356 | 0.697 | 0.966 | 0.623 | Vitamins         |
| A28 | 158   | 96    | 130   | 158   | 132   | 139   | 118   | 119   | 91    | 122   | 0.108 | 0.277 | 0.329 | 0.212 | 0.789 | 0.219 | 0.955 | 0.020 | 0.079 |                  |
| A29 | 8,473 | 6,966 | 9,598 | 8,266 | 9,511 | 9,596 | 8,906 | 9,233 | 8,767 | 9,443 | 0.521 | 0.486 | 0.022 | 0.560 | 0.941 | 0.822 | 0.827 | 0.888 | 0.728 | uronic acid      |
| A30 | 57    | 53    | 52    | 53    | 54    | 43    | 45    | 57    | 46    | 61    | 0.651 | 0.404 | 0.913 | 0.606 | 0.017 | 0.082 | 0.125 | 0.116 | 0.014 |                  |
| A31 | 72    | 113   | 161   | 184   | 139   | 116   | 184   | 124   | 69    | 104   | 0.089 | 0.137 | 0.658 | 0.027 | 0.335 | 0.299 | 0.542 | 0.896 | 0.136 | indoles          |
| A32 | 100   | 118   | 42    | 205   | 192   | 214   | 147   | 143   | 159   | 89    | 0.775 | 0.315 | 0.036 | 0.170 | 0.662 | 0.413 | 0.958 | 0.410 | 0.228 | alcohol          |
| A33 | 82    | 85    | 58    | 48    | 53    | 24    | 37    | 58    | 47    | 56    | 0.810 | 0.247 | 0.621 | 0.204 | 0.191 | 0.030 | 0.134 | 0.022 | 0.599 | Cresols          |
| A34 | 4,319 | 5,473 | 3,365 | 5,642 | 5,866 | 5,891 | 4,329 | 5,507 | 4,205 | 4,744 | 0.210 | 0.028 | 0.057 | 0.060 | 0.980 | 0.988 | 0.316 | 0.776 | 0.193 | Eicosanoids      |
| A35 | 817   | 511   | 730   | 698   | 553   | 663   | 384   | 590   | 703   | 602   | 0.201 | 0.408 | 0.803 | 0.025 | 0.224 | 0.138 | 0.424 | 0.445 | 0.489 | purines          |
| A36 | 1,899 | 1,679 | 1,074 | 1,521 | 949   | 1,273 | 828   | 1,286 | 1,200 | 940   | 0.475 | 0.053 | 0.170 | 0.024 | 0.282 | 0.015 | 0.109 | 0.064 | 0.406 | D-Galactose      |
| A37 | 565   | 498   | 615   | 516   | 526   | 452   | 478   | 473   | 493   | 630   | 0.100 | 0.150 | 0.030 | 0.314 | 0.129 | 0.392 | 0.961 | 0.197 | 0.105 | Sulfuric Acids   |

The differently shaded cells of the table meant to represent the difference of relative ion intensity. A1, 3-Methylhistamine; A2, Acetylcholine; A3, Histamine; A4, Spermidine; A5, Sphingosine; A6, Citrulline; A7, L-Arginine; A8, L-Glutamic acid; A9, L-Methionine; A10, Methionine sulfoxide; A11, Taurine; A12, 16-Hydroxy hexadecanoic acid; A13, 2-Furoic acid; A14, 8,11,14-Eicosatrienoic acid; A15, Adrenic acid; A16, Docosaehaenoic acid; A17, Eicosapentaenoic acid; A18, Elaidic acid; A19, Ethyl dodecanoate; A20, Ethyl tetradecanoate; A21, Oxoglutaric acid; A22, Pelargonic acid; A23, Ginkgoic acid; A24, Urocanic acid; A25, Beta-D-Fructose 6-phosphate; A26, Ribose 1-phosphate; A27, L-Acetylcarnitine; A28, Pantothenic acid; A29, L-Norleucine; A30, Beta-D-Glucopyranuronic acid; A31, Indoxyl sulfate; A32, Corticosterone; A33, 2,6-Di-tert-butyl-4-hydroxymethylphenol; A34, 11,12-EpETrE; A35, Uric acid; A36, D-Galactose; A37, Sulfate.

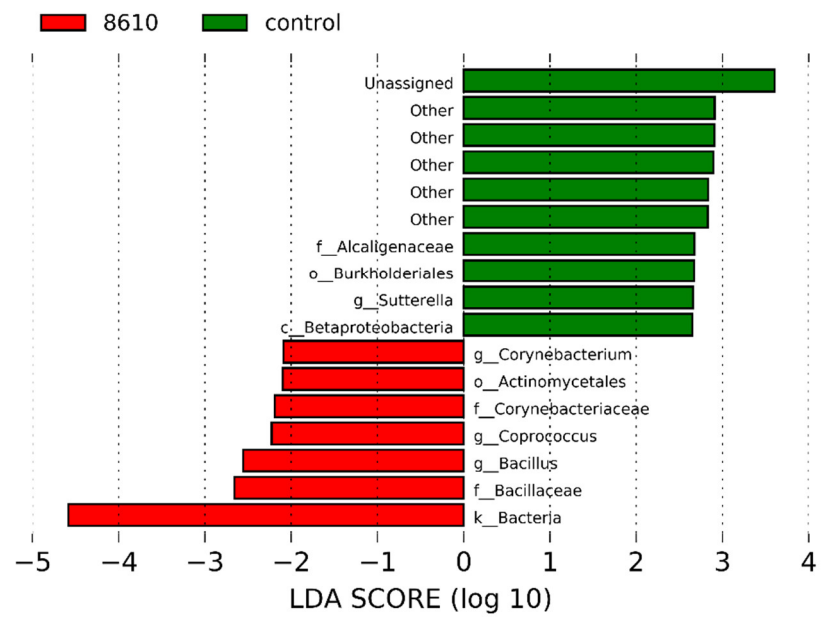

**Figure S1.** LDA effect size (LEfSe) analysis results of fecal microbiota in CCFM8610 treated groups.

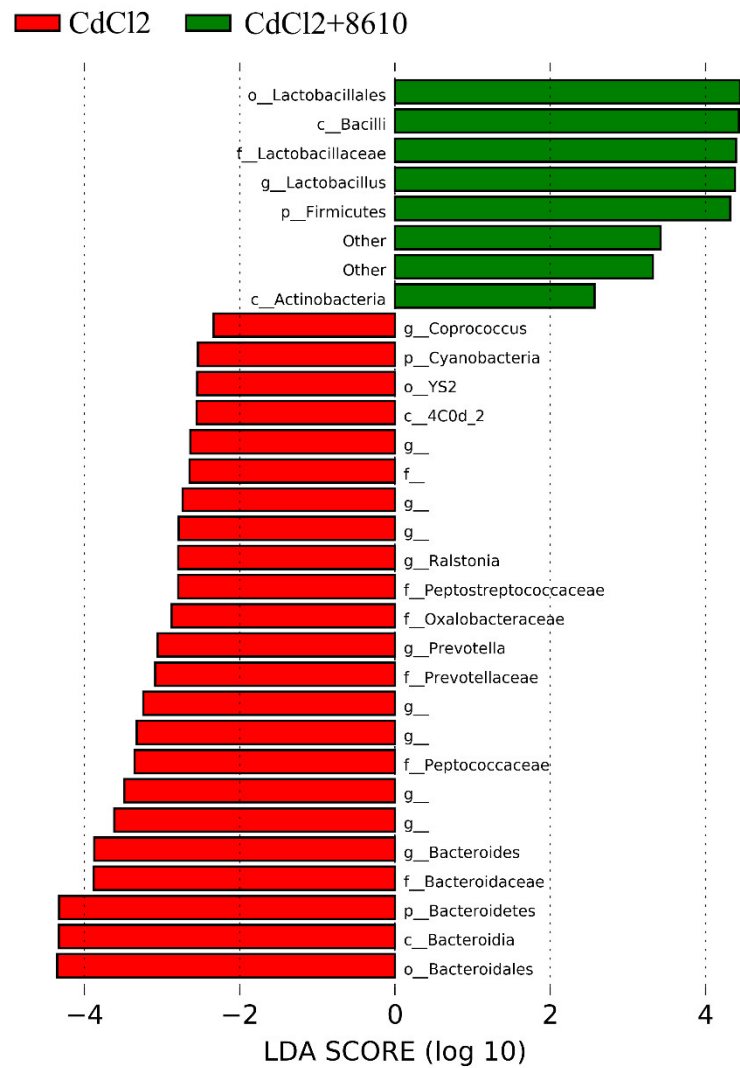

**Figure S2.** LDA effect size (LEfSe) analysis results of fecal microbiota in CdCl<sub>2</sub> treated groups.

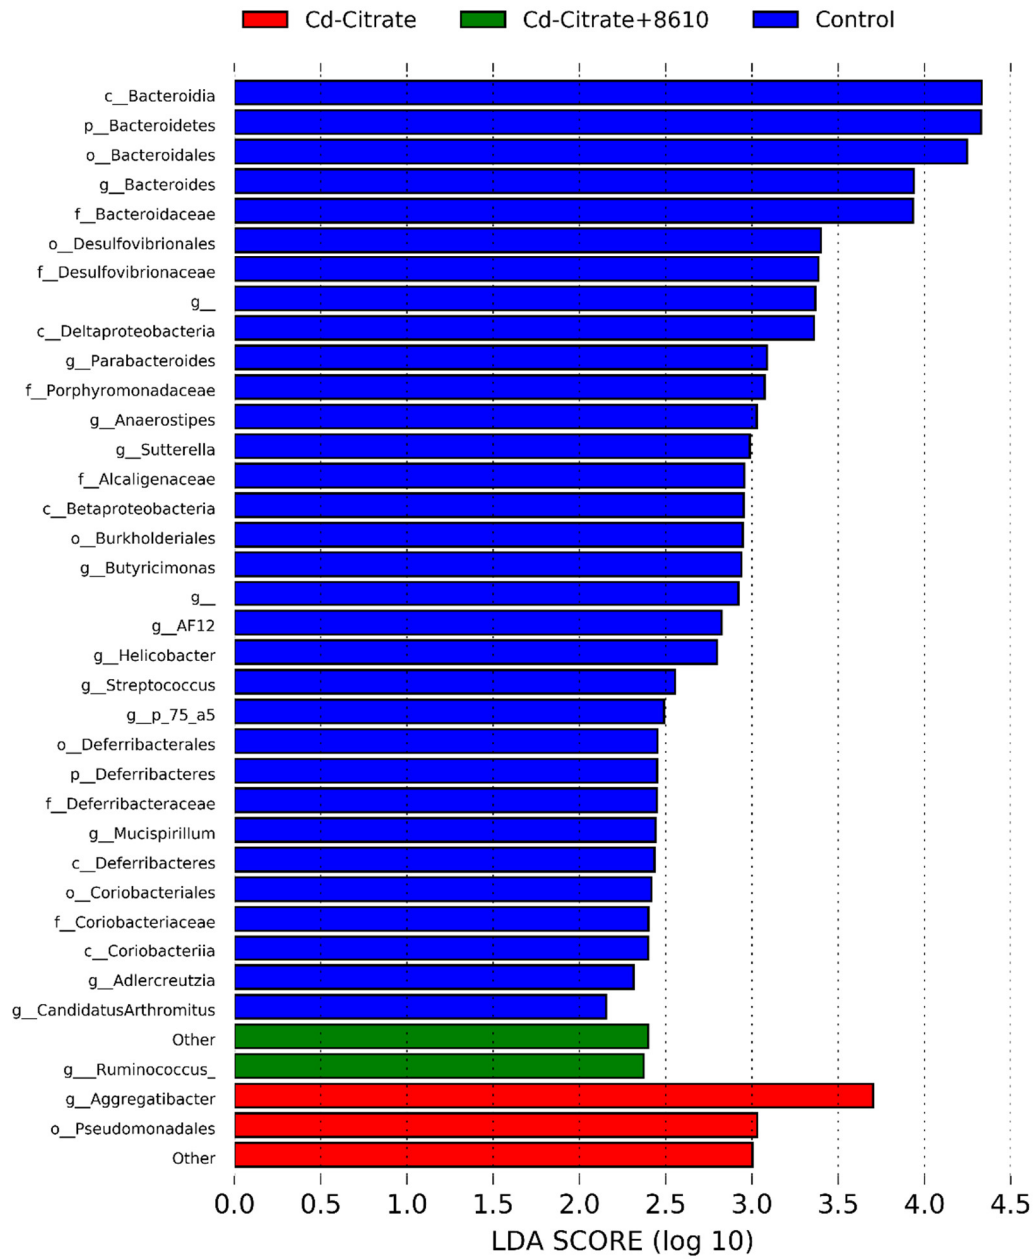

**Figure S3.** LDA effect size (LEfSe) analysis results of fecal microbiota in Cd-Citrate treated groups.

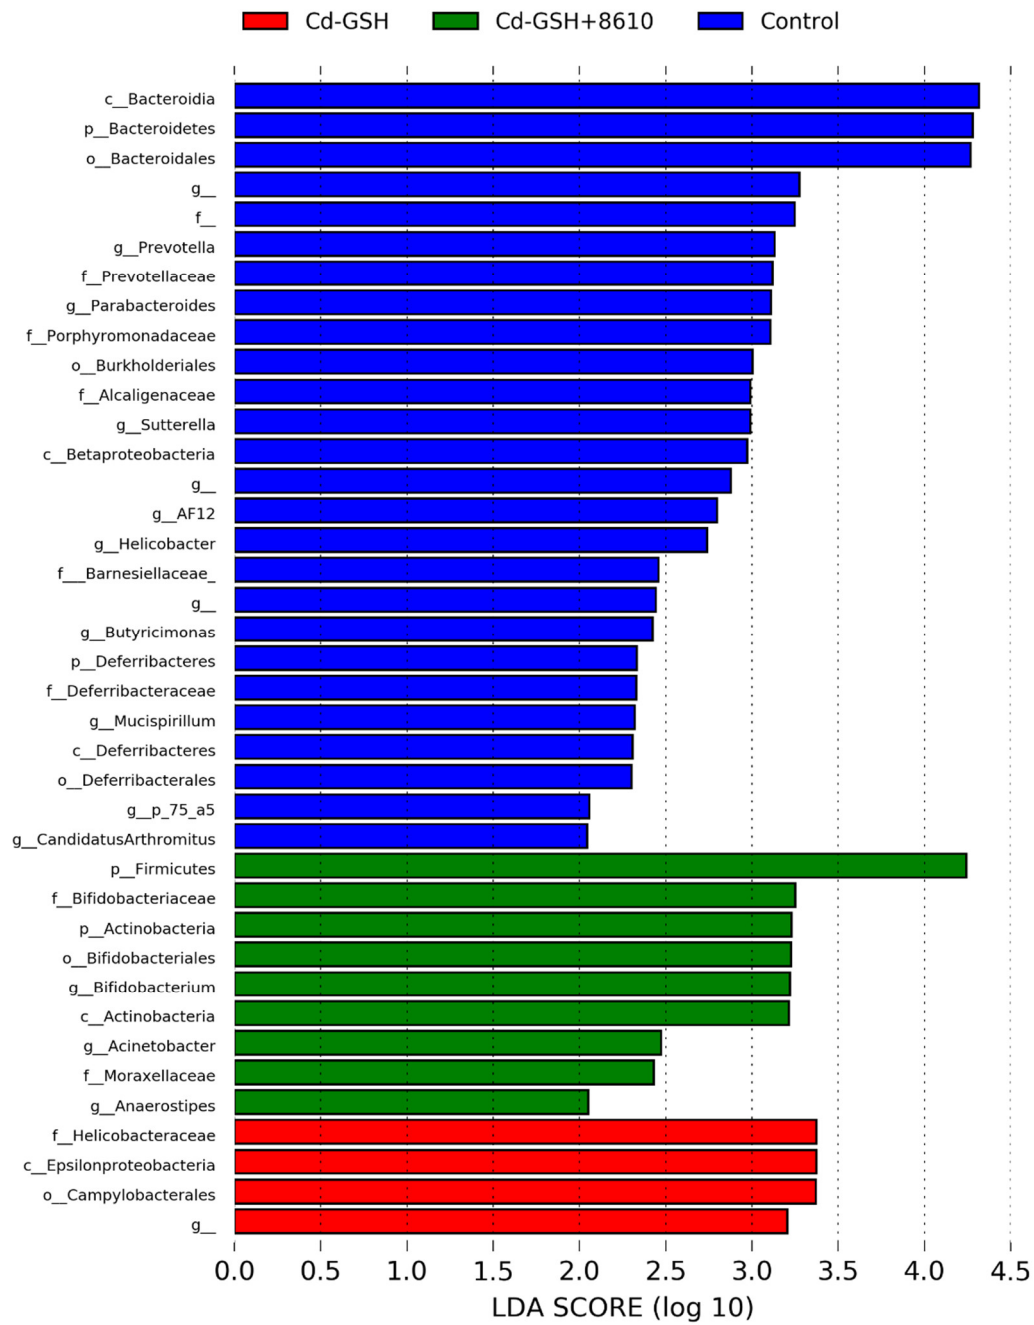

**Figure S4.** LDA effect size (LEfSe) analysis results of fecal microbiota in Cd-GSH treated groups.

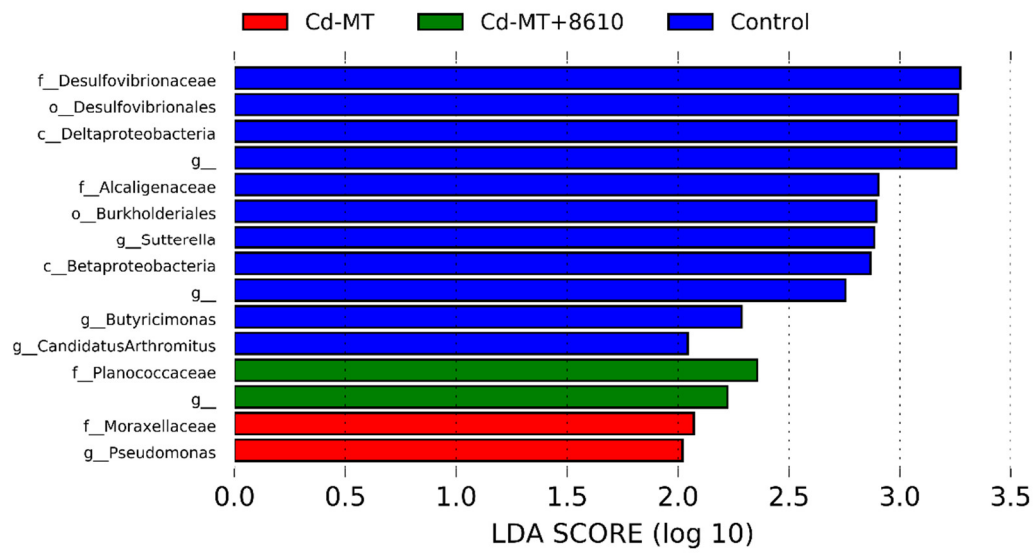

**Figure S5.** LDA effect size (LEfSe) analysis results of fecal microbiota in Cd-MT treated groups.
